# Supplementary material for: The Non-structural Protein 5 and Matrix Protein Are Antigenic Targets of T Cell Immunity to Genotype 1 Porcine Reproductive and Respiratory Syndrome Viruses
Source: PubMed Central journal article supplement (PMC4755262; doi:10.3389/fimmu.2016.00040), 2016-02-16
Supplement: datasheet_1.pdf [file datasheet_1.pdf]

**A**

|                   |    | NSP5 Matrix Pools* |    |    |    |    |    |
|-------------------|----|--------------------|----|----|----|----|----|
|                   |    | A#                 | B# | C  | D  | E  | F  |
| NSP5 Matrix Pools | G  | 1                  | 2  | 3  | 4  | 5  | 6  |
|                   | H  | 7                  | 8  | 9  | 10 | 11 | 12 |
|                   | I  | 13                 | 14 | 15 | 16 | 17 | 18 |
|                   | J  | 19                 | 20 | 21 | 22 | 23 | 24 |
|                   | K  | 25                 | 26 | 27 | 28 | 29 | 30 |
|                   | L  | 31                 | 32 | 33 | 34 | 35 | 36 |
|                   | M# | 37                 | 38 | 39 | 40 |    |    |

**B**

|         |       | CD4 T cell – M peptides |                        |                      | CD8 T cell – NSP5 peptides |  |  |  |
|---------|-------|-------------------------|------------------------|----------------------|----------------------------|--|--|--|
| Group   | Pig   | Positive matrix pool    | Corresponding peptides | Positive matrix pool | Corresponding peptides     |  |  |  |
| Olot/91 | 70    | A B C H                 | 7 8 9                  | C D E F G            | 3 4 5 6 39 40              |  |  |  |
|         |       | M                       |                        |                      |                            |  |  |  |
|         | 71    | A B C H                 | 7 8 9                  | C D E G M            | 3 4 5 39 40                |  |  |  |
|         |       | -                       | -                      | A B M                | 37 38                      |  |  |  |
|         |       | -                       | -                      | A B M                | 37 38                      |  |  |  |
| SU1-Bel | 00    | -                       | -                      | A B M                | 37 38                      |  |  |  |
|         | 72    | A B C H                 | 7 8 9                  | C D G M              | 3 4 39 40                  |  |  |  |
|         | 73    | -                       | -                      | C D M                | 39 40                      |  |  |  |
|         | 88    | A B H                   | 7 8                    | A C D G M            | 1 3 4 37 39 40             |  |  |  |
|         | 89    | -                       | -                      | -                    | -                          |  |  |  |
| 01      | A B H | 7 8                     | C D M                  | 39 40                |                            |  |  |  |

**C**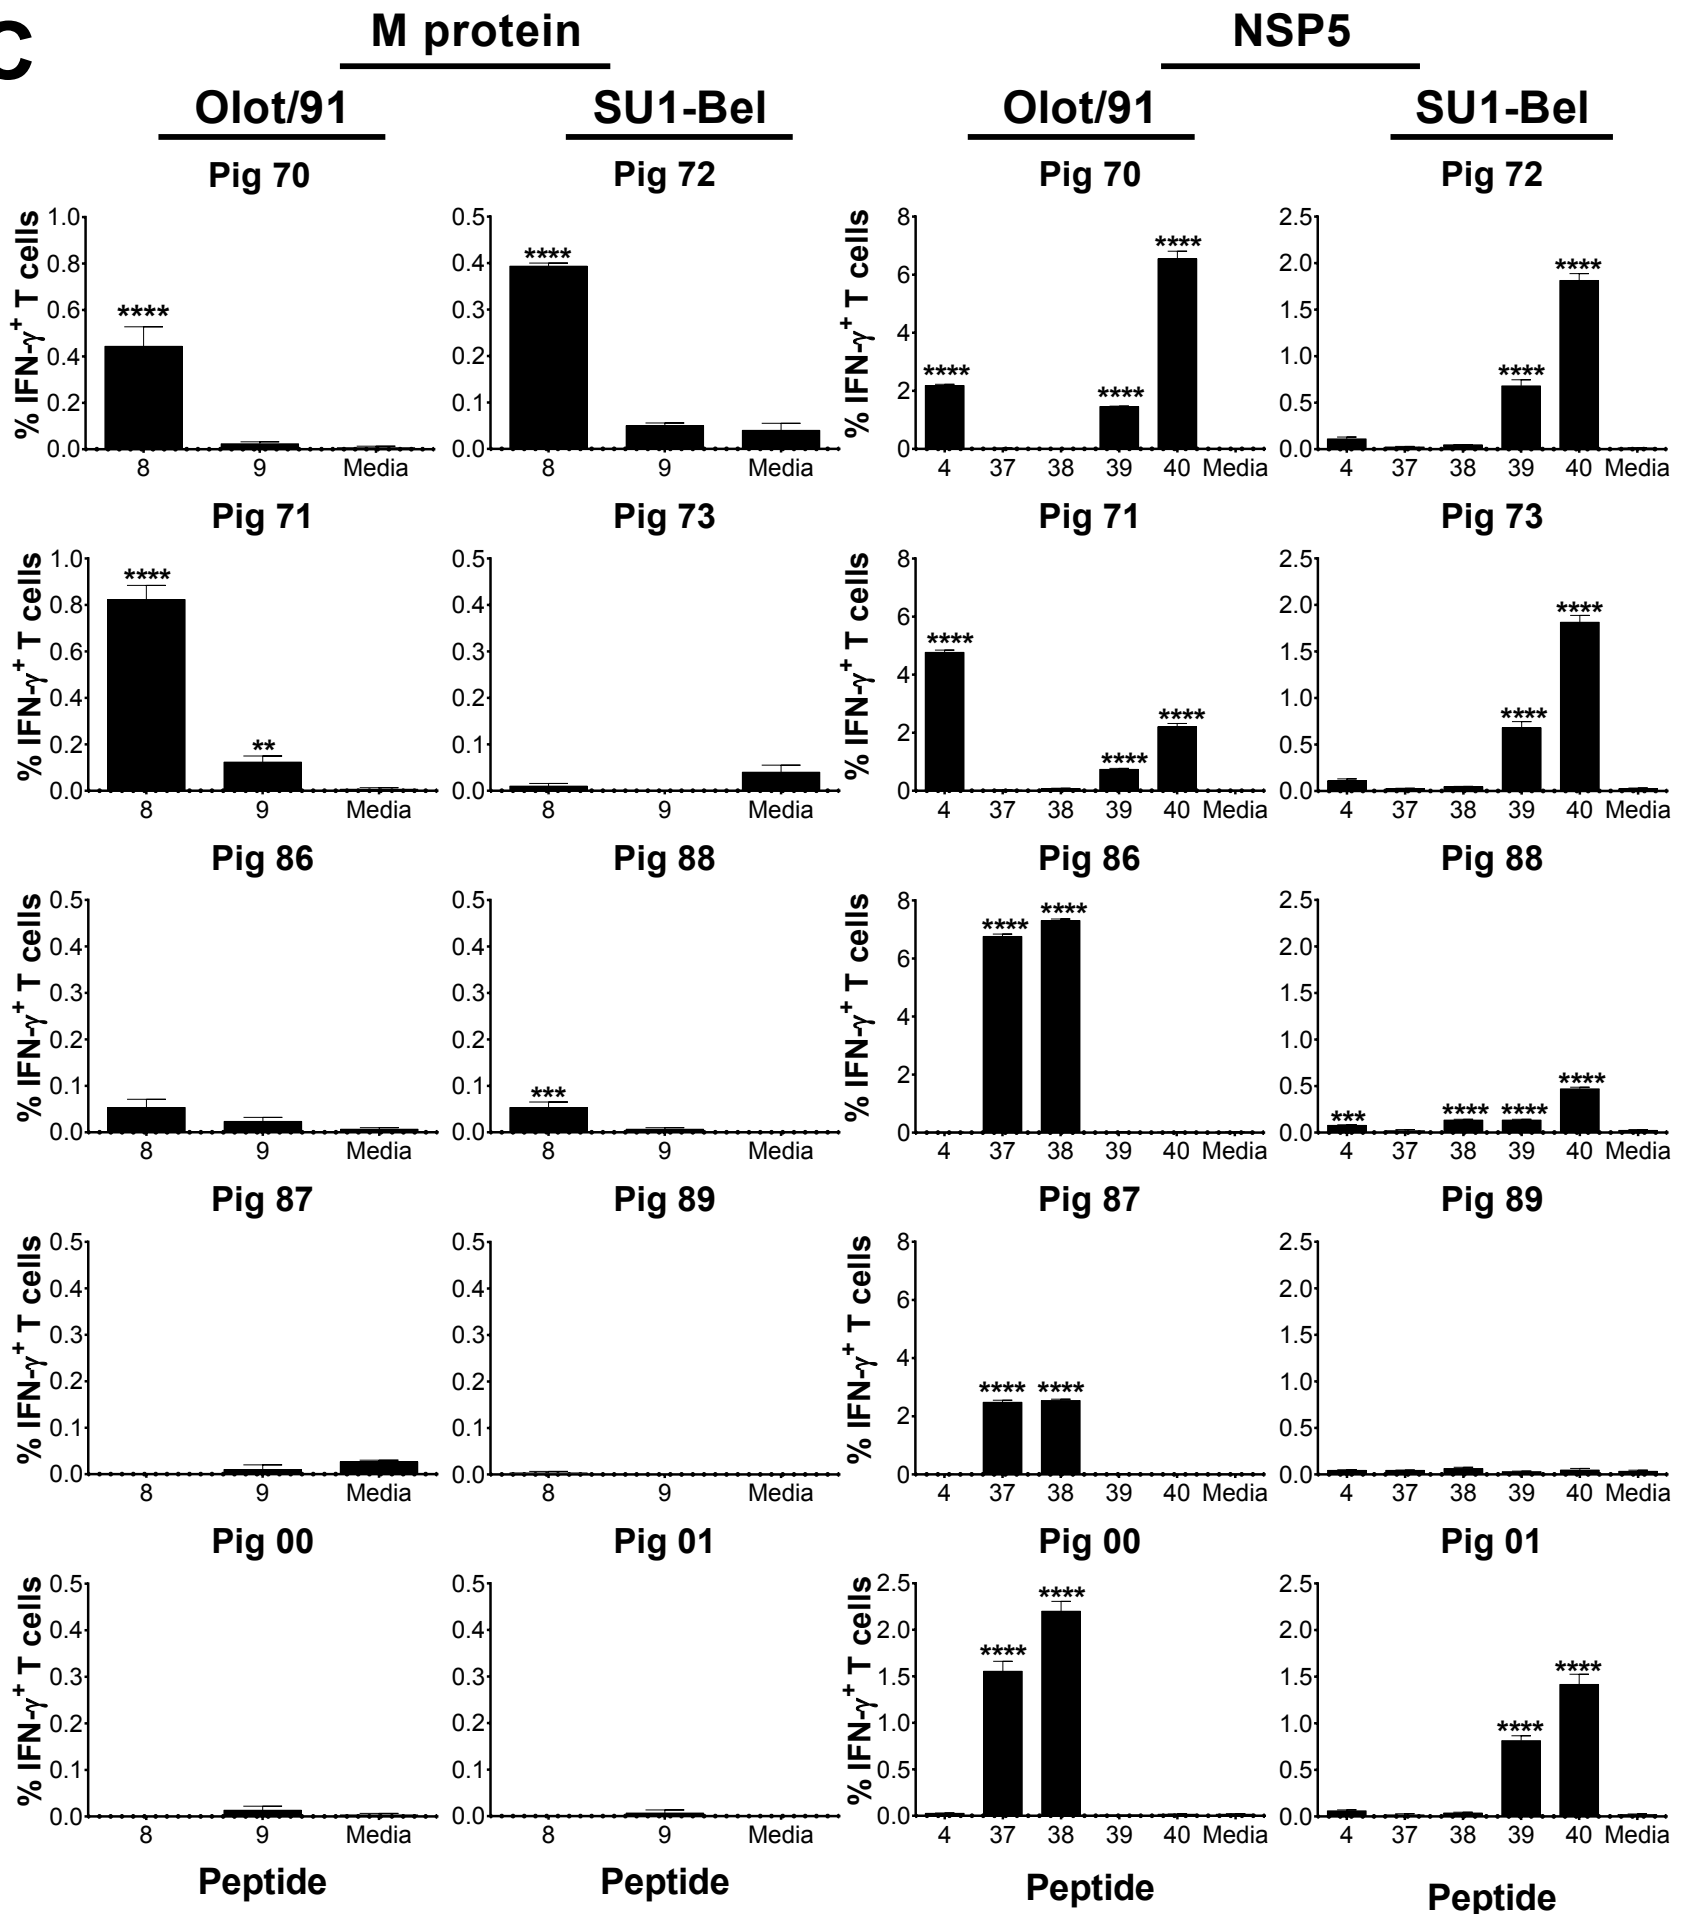

**Supplementary Data Sheet 1. Identification of antigenic peptides within PRRSV-1 M and NSP5 peptide pools.** Individual peptides representing PRRSV-1 M and NSP5 proteins were combined using a two-way matrix-pooling system as illustrated for NSP5 peptides (A): The 40 overlapping 15mer peptides (#1–40) representing NSP5 were pooled so that each peptide was uniquely represented in two matrix-pools (Pools A–M). #Matrix pools A, B and M stimulated CD8 T cell IFN- $\gamma$  reactivity from pig 86 and so overlapping peptides #37 and #38 were identified for further testing. Screening of matrix pools identified a number of putative antigenic M and NSP5 peptides recognised by CD4 and CD8 T cells, respectively (B). T cell reactivity against selected putative antigenic peptides was assessed using PBMC isolated from pigs on day 58 post-infection (C). IFN- $\gamma$  expression by CD4 T cells to individual M peptides and CD8 T cells to individual NSP5 peptides were assessed by flow cytometry. The mean % of unstimulated (media) and peptide stimulated data from duplicate cultures are presented and error bars show the SEM. Values were compared to the unstimulated control using a one way ANOVA followed by a Dunnett's multiple comparisons test; \*\*\*\*  $p < 0.0001$ , \*\*\*  $p < 0.001$ , \*\*  $p < 0.01$ .
